# Supplementary material
Source: HighWire-hosted journal article supplement (https://rmdopen.bmj.com/content/7/2/e001580)
Supplement: inline-supplementary-material-1 [file inline-supplementary-material-1.xlsx]

## Sheet: Table 1
Study	Total	ICU or sever	Non-ICU or non-severe	outpatient	Age, years (Mean)	Male (n)	C-RP, mg/L	C-RP, mg/L (+aPL)	C-RP, mg/L (-aPL)	PT, sec	PTT, sec	Fibrinogen, mg/dL	D-dimer, ng/mL	D-dimer, ng/mL (+aPL)	D-dimer, ng/mL (-aPL)	Invasive Ventilation	Ventilation(+aPL)	Ventilation(-aPL)	Thrombosis #	Thrombosis (+aPL)	Thrombosis (-aPL)	In-hospital death	In-hospital death (+aPL)	In-hospital death (-aPL)	Discharged	Still in hospitla	Heparin	aPL*	aCL (IgM or IgG)	aCL (IgM)	aCL (IgG)	aCL (IgA)	anti-ß2 GPI (IgM or IgG	anti-ß2 GPI (IgM)	anti-ß2 GPI (IgG)	anti-ß2 GPI (IgA)	Lupus anti-coagulent	aPS/PT (IgM or IgG)	Double +	Triple +	ANA (Mean)	HTN	DM	Obesity	CAD	stroke	Lung disease	CKD	CHF
Zhang Y (2)	19	19	0	0	65	10	NA	NA	NA	NA	NA	NA	NA	NA	NA	17	NA	NA	9	9	0	12	4	8	NA	NA	NA	10	NA	NA	NA	NA	NA	NA	NA	NA	NA	NA	NA	NA	NA
Amezcua-Guerra LM (7)	21	21	0	0	62	9	90	140	39	NA	NA	NA	417	437	403	12	7	5	NA	NA	NA	4	2	2	13	4	18	12	NA	3	2	NA	1	0	1	NA	NA	NA	NA	NA	NA	12	8	7	3	1	2	3	2
Xiao M (8)	66	66	0	0	65	12	NA	NA	NA	NA	NA	NA	NA	NA	NA	57	29	28	25	15	10	NA	NA	NA	NA	NA	NA	31	NA	2	4	17	NA	1	12	19	2	7	NA	NA	NA	33	13		10		7	1
Xiao M (8)	13	0	13	0	NA	NA	NA	NA	NA	NA	NA	NA	NA	NA	NA	0	0	0	NA	NA	NA	NA	NA	NA	NA	NA	NA	0	NA	NA	NA	NA	NA	NA	NA	NA	NA	NA	NA	NA	NA
Zuo Y (9)	172	172		0	61	97	NA	NA	NA	NA	NA	NA	NA	NA	NA	NA	NA	NA	11	NA	NA	33	NA	NA	126	13	NA	89	NA	39	8	6	NA	9	5	7	NA	31(IgM), 42(IgG)	41	13	NA	117	70	87	53	16	47	51
Borghi MO (10)	122	122	0	0	68.5	NA	NA	NA	NA	NA	NA	NA	NA	NA	NA	NA	NA	NA	16	NA	NA	NA	NA	NA	NA	NA	120 (84T) (36 P)	NA	NA	8	7	NA	NA	11	19	NA	NA	15	NA	NA	NA
Fan S (11)	86	86	0	0	66.6	54	95	NA	NA	NA	42.8	NA	9000	NA	NA	70	NA	NA	NA	NA	NA	55	NA	NA	NA	NA	48	12	NA	NA	NA	NA	NA	NA	NA	NA	NA	NA	NA	NA	NA	44	19		16	7
Ferrari E (12)	89	31	58	0	68	61	105	181	184	83	29.7	645	1799	1782	1834	NA	NA	NA	14	6	8	NA	NA	NA	NA	NA	NA	64	7	NA	NA	NA	6	NA	NA	NA	59	NA	2	3	NA
Ferrari E (12)		31	0	0	NA	NA	NA	NA	NA	82	30.1	705	4303	NA	NA	NA	NA	NA	NA	NA	NA	10	7	3	NA	NA	NA	22	2	NA	NA	NA	1	NA	NA	NA	19	NA	0	0	NA
Ferrari E (12)		0	58	0	NA	NA	NA	NA	NA	83	29.7	620	1435	NA	NA	NA	NA	NA	NA	NA	NA	NA	NA	NA	NA	NA	NA	42	5	NA	NA	NA	5	NA	NA	NA	40	NA	2	3	NA
Gazzaruso c (13)	45	0	45	0	66	36	174	NA	NA	12.1	30.3	NA	2854	NA	NA	NA	NA	NA	NA	NA	NA	NA	NA	NA	NA	NA	NA	NA	2	1	1	NA	NA	3	2	NA	20	NA	NA	NA	16
Gutiérrez López (14)	27	6	21	0	58	12	73	NA	NA	12.8	32	648	2367	NA	NA	NA	NA	NA	15	3	12	3	NA	NA	NA	NA	27(P)	7	0	0	0	NA	1	NA	NA	NA	6	NA	0	0	NA	10	3	5
Harzallah I (15)	56	56		0	NA	NA	NA	NA	NA	NA	NA	NA	NA	NA	NA	NA	NA	NA	NA	NA	NA	NA	NA	NA	NA	NA	NA	5	NA	NA	NA	NA	NA	NA	NA	NA	25	NA	NA	NA	NA
Helms J (16)	57	57	0	0	NA	NA	NA	NA	NA	NA	NA	NA	NA	NA	NA	NA	NA	NA	NA	NA	NA	NA	NA	NA	NA	NA	NA	NA	NA	NA	NA	NA	NA	NA	NA	NA	50	NA	NA	NA	NA
Devreese KMJ (17)	31	31	0	0	63	28	NA	NA	NA	NA	NA	NA	NA	NA	NA	26	NA	NA	9	7	3	NA	NA	NA	NA	NA	19(P) 10(T)	23	7	NA	NA	NA	3	NA	NA	NA	21	NA	NA	2	NA		8	4	14	1	2	6
Gatto M (18)	112	52		60	54	60	NA	NA	NA	NA	NA	NA	NA	NA	NA	NA	NA	NA	18 of 106	10 of 41	8 of 65	NA	NA	NA	NA	NA	NA	52	NA	3	15	NA	NA	8	7	NA	16 of 72	NA	NA	NA	NA
Gatto M (18)		52		0	64	27	NA	NA	NA	NA	NA	NA	NA	NA	NA	NA	NA	NA	18	NA	NA	NA	NA	NA	NA	NA	NA	26	NA	2	10	NA	NA	4	4	NA	7 out of 42	NA	NA	NA	NA
Bertin D (19)	27	0	27	0	66.7	14	NA	NA	NA	NA	NA	NA	NA	NA	NA	NA	NA	NA	NA	NA	NA	NA	NA	NA	NA	NA	NA	NA	NA	3	3	NA	NA	2	1	NA	NA	NA	NA	NA	NA	15	7		3	0	4		1
Bertin D (19)	29	29	0	0	66.6	19	NA	NA	NA	NA	NA	NA	NA	NA	NA	NA	NA	NA	NA	NA	NA	NA	NA	NA	NA	NA	NA	NA	13	0	13	NA	2	2	0	NA	NA	NA	NA	NA	NA	13	3		1	2	2		2
Pineton D (20)	25	25	0	0	74	17	NA	NA	NA	NA	NA	NA	NA	NA	NA	NA	NA	NA	6	NA	NA	NA	NA	NA	NA	NA	25	24	13	5	13	7	3	NA	NA	NA	23	NA	13	3	NA
Previtali G (21)	35	35	0	0	73	26	NA	NA	NA	NA	NA	NA	NA	NA	NA	NA	NA	NA	10	NA	NA	35	NA	NA	NA	NA	NA	6	3	NA	NA	NA	0	NA	NA	NA	NA	3	NA	NA	NA	17		4	10	8	1	3
Reyes Gil M (22)	68	68		0	NA	NA	NA	144	75	NA	NA	NA	NA	8000	5700	34	15	19	32	19	13	24	14	10	NA	NA	NA	32	1	1	0	NA	1	1	0	NA	30	NA	NA	NA	NA
Siguret V (23)	74	74	0	0	64	NA	NA	NA	NA	NA	NA	NA	NA	NA	NA	74	NA	NA	28	NA	NA	19	NA	NA	NA	NA	54(P), 20(T)	65	9	NA	NA	NA	NA	NA	NA	NA	63	NA	NA	NA	NA	33	30		14
Pascolini S (24)	33	9	23	0	70	17	NA	NA	NA	NA	NA	NA	NA	NA	NA	NA	NA	NA	NA	NA	NA	7	6	1	NA	NA	33(P)	8	8	6	5	NA	3	2	2	NA	NA	NA	NA	NA	11 (1:640)
Tvito A (25)	43	43		0	NA	27	NA	82	82	NA	NA	NA	NA	1835	2580	NA	NA	NA	3	1	2	NA	NA	NA	NA	NA	8(P),8(T)	16	0	0	0	0	0	0	0	NA	16 of 43	NA	NA	NA	NA
Vlachoyiannopoulos PG (26)	29	29	0	0	64	21	NA	NA	NA	NA	NA	NA	NA	NA	NA	NA	NA	NA	NA	NA	NA	4	NA	NA	21	4	NA	16	7	3	7	NA	10	8	5	NA	NA	NA	1	NA	10 (1:256)	12	2	3	1			1
[truncated: 4 more columns]

## Sheet: Sheet1
Amezcua-Guerra LM (7)
Pascolini S (13)
Bertin D (26)
Bertin D (26)
Borghi MO (18)
Devreese KMJ (25)
Fan S (19)
Ferrari E (20)
Ferrari E (20)
Ferrari E (20)
Gatto M (8)
Gatto M (8)
Gazzaruso c (21)
Gutiérrez López (22)
Harzallah I (23)
Helms J (24)
Pineton D (9)
Previtali G (10)
Reyes Gil M (11)
Siguret V (12)
Tvito A (14)
Vlachoyiannopoulos PG (15)
Xiao M (16)
Xiao M (16)
Zuo Y (17)
